# Supplementary material for: Curcumin inhibits in vitro and in vivo chronic myelogenous leukemia cells growth: a possible role for exosomal disposal of miR-21
Source: PubMed Central journal article supplement (PMC4673136; doi:10.18632/oncotarget.4204), 2015-06-08
Supplement: oncotarget-06-21918-s001.pdf [file oncotarget-06-21918-s001.pdf]

SUPPLEMENTARY FIGURES

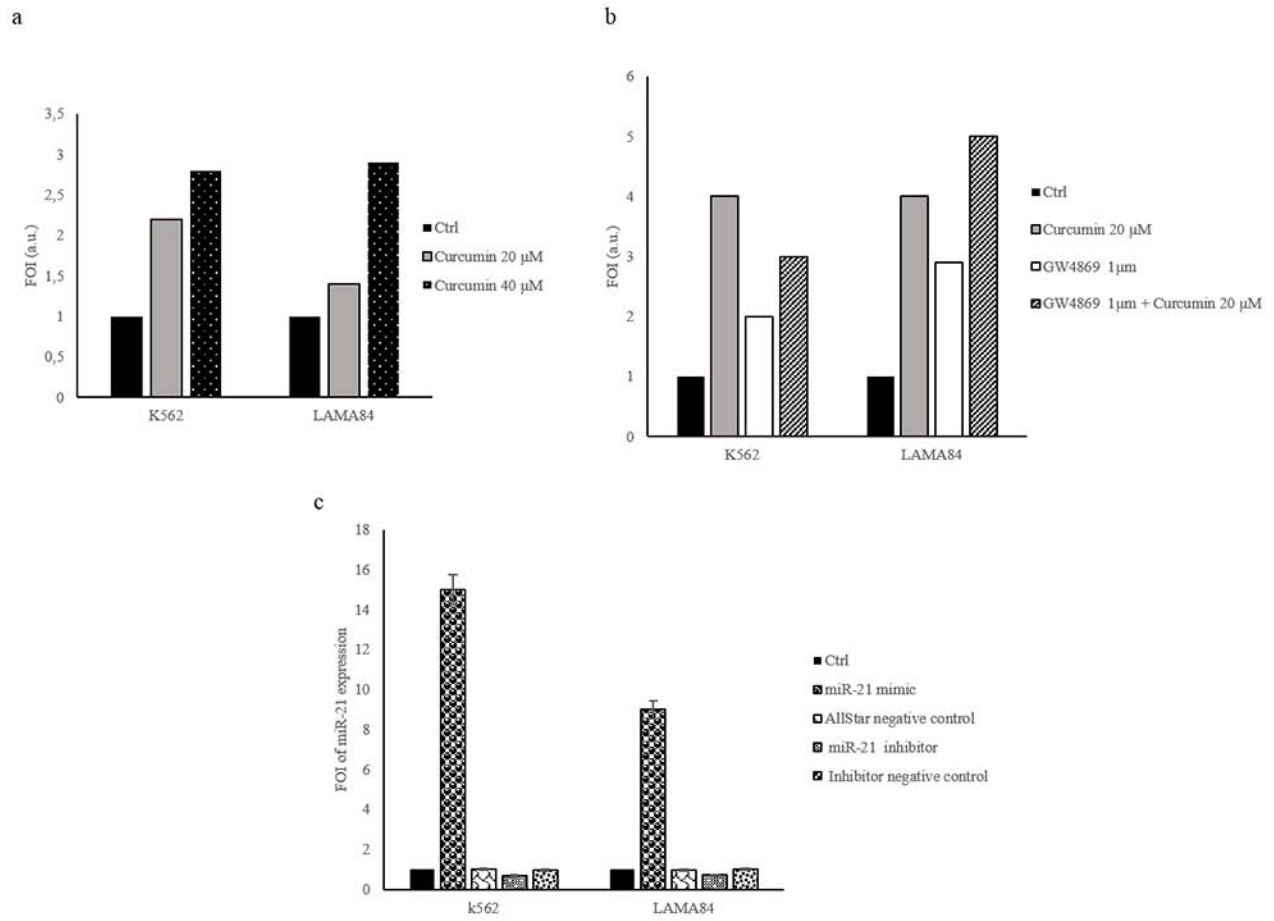

**Supplementary Figure S1: a.** Densitometric analyses of western blot for PTEN showed in Figure 4b. **b.** Densitometric analyses of western blot for PTEN showed in Figure 4e. **c.** Real Time PCR analysis of miR-21 expression levels in K562 and LAMA84 transfected with miR-21 mimic, inhibitor and Scrambles compared with untransfected cells (Ctrl).

a

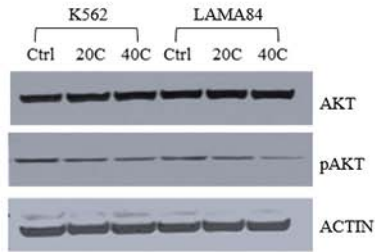

b

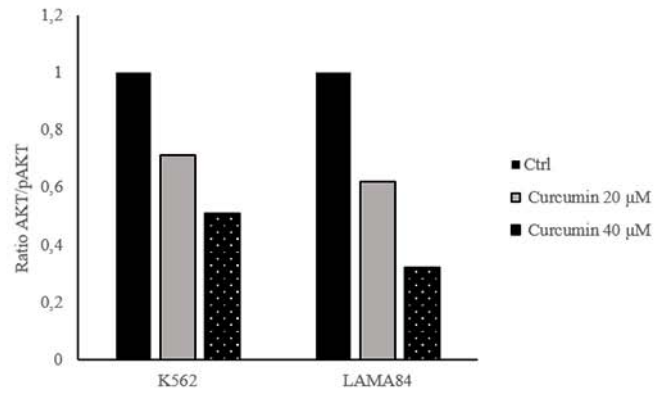

**Supplementary Figure S2: a. Western blot analysis of AKT and pAKT in K562 and LAMA84 cells treated with 20 and 40 μM of Curcumin, for 24 hours.** Actin was used as loading control. Ratio of densitometric analyses of western blot for AKT and pAKT showed in Figure 2Sa.
